# Supplementary material for: Attenuation of melanogenesis by Nymphaea nouchali (Burm. f) flower extract through the regulation of cAMP/CREB/MAPKs/MITF and proteasomal degradation of tyrosinase
Source: PubMed Central journal article supplement (PMC6141596; doi:10.1038/s41598-018-32303-7), 2018-09-17
Supplement: 41598_2018_32303_MOESM1_ESM.pdf [file 41598_2018_32303_MOESM1_ESM.pdf]

2  
3  
4  
5  
6 **Attenuation of melanogenesis by *Nymphaea nouchali***  
7 **(Burm. f) flower extract through the regulation of**  
8 **cAMP/CREB/MAPKs/MITF and proteasomal**  
9 **degradation of tyrosinase**

10  
11 **Md Badrul Alam<sup>1,2#</sup>, Arif Ahmed<sup>3#</sup>, Md Abdul Motin<sup>4</sup>, Sunghwan Kim<sup>3,5\*</sup>, Sang-**  
12 **Han Lee<sup>1,2\*</sup>**

13 <sup>1</sup>Department of Food Science and Biotechnology, Graduate School, Kyungpook National  
14 University, Daegu 41566, Korea

15 <sup>2</sup>Food and Bio-Industry Research Institute, Inner Beauty/Anti-Ageing Center, Kyungpook  
16 National University, Daegu 41566, Korea

17 <sup>3</sup>Department of Chemistry, Kyungpook National University, Daegu 41566, Korea

18 <sup>4</sup>Institute of Material Chemistry, Vienna University of Technology, Vienna, Austria

19 <sup>5</sup>Green-Nano Materials Research Center, Kyungpook National University, Daegu 41566,  
20 Korea

21  
22 **#These authors contributed equally to this work.**

23  
24 **\*Correspondence to:**

25 Dr. Sunghwan Kim; Tel.: +82-53-950-5333; E-mail: [sunghwank@knu.ac.kr](mailto:sunghwank@knu.ac.kr)

26 Dr. Sang-Han Lee; Tel.: +82-53-950-7754; E-mail: [sang@knu.ac.kr](mailto:sang@knu.ac.kr)

**Table S1: List of the primer sets used in this study**

| <b>Gene name</b>  |                | <b>Sequences</b>            |
|-------------------|----------------|-----------------------------|
| <i>Tyrosinase</i> | <i>forward</i> | <i>TATGCGATGGAACACCTGAG</i> |
|                   | <i>reverse</i> | <i>ATAGGTGCATTGGCTTCTGG</i> |
| <i>TYRP1</i>      | <i>forward</i> | <i>TCACTGATGCGGTCTTTGAC</i> |
|                   | <i>reverse</i> | <i>TTCGGGAGCTCCTCATAGTC</i> |
| <i>TYRP2</i>      | <i>forward</i> | <i>CCCGACTGTAATCGGAAGAA</i> |
|                   | <i>reverse</i> | <i>TCCAGCCACAACAGATGGTA</i> |
| <i>MITF</i>       | <i>forward</i> | <i>ACCCGTCTCTGGAAACTTGA</i> |
|                   | <i>reverse</i> | <i>TCCACAGAGGCCTTGAGAAT</i> |
| <i>Pmel 17</i>    | <i>forward</i> | <i>GGCACACACACAATGGAAGT</i> |
|                   | <i>reverse</i> | <i>GCTTCTGCAGTTGGCATGTA</i> |
| <i>SLC24A5</i>    | <i>forward</i> | <i>GGGCTCTATGTTCTGCTGCT</i> |
|                   | <i>reverse</i> | <i>TCTCCTGCAGTCTGGTGTG</i>  |
| <i>SLC45A2</i>    | <i>forward</i> | <i>CTAACCCAAGGCAGAAGCTG</i> |
|                   | <i>reverse</i> | <i>CGTATTCATGCATCCCCTG</i>  |
| <i>OCA2</i>       | <i>forward</i> | <i>GACATGCGCCTAGAGAACAA</i> |
|                   | <i>reverse</i> | <i>AGCAACCTCTTTACCCAGCA</i> |
| <i>VDAC</i>       | <i>forward</i> | <i>TGGGAAATTAAGGCCTCCT</i>  |
|                   | <i>reverse</i> | <i>GCTGTCCATGCCAGGTTTAT</i> |
| <i>TRPM1</i>      | <i>forward</i> | <i>AGACCATGTCCAACCCTCTG</i> |
|                   | <i>reverse</i> | <i>CGCAGTATTTGTGTGCGAAG</i> |
| <i>Gapdh</i>      | <i>Forward</i> | <i>TTGTGATGGGTGTGAACCAC</i> |
|                   | <i>reverse</i> | <i>ACACATTGGGGGTAGGAACA</i> |

30  
31  
32  
33  
34  
35  
36  
37  
38  
39  
40  
41  
42  
43  
44  
45  
46  
47  
48  
49  
50  
51  
52  
53  
54

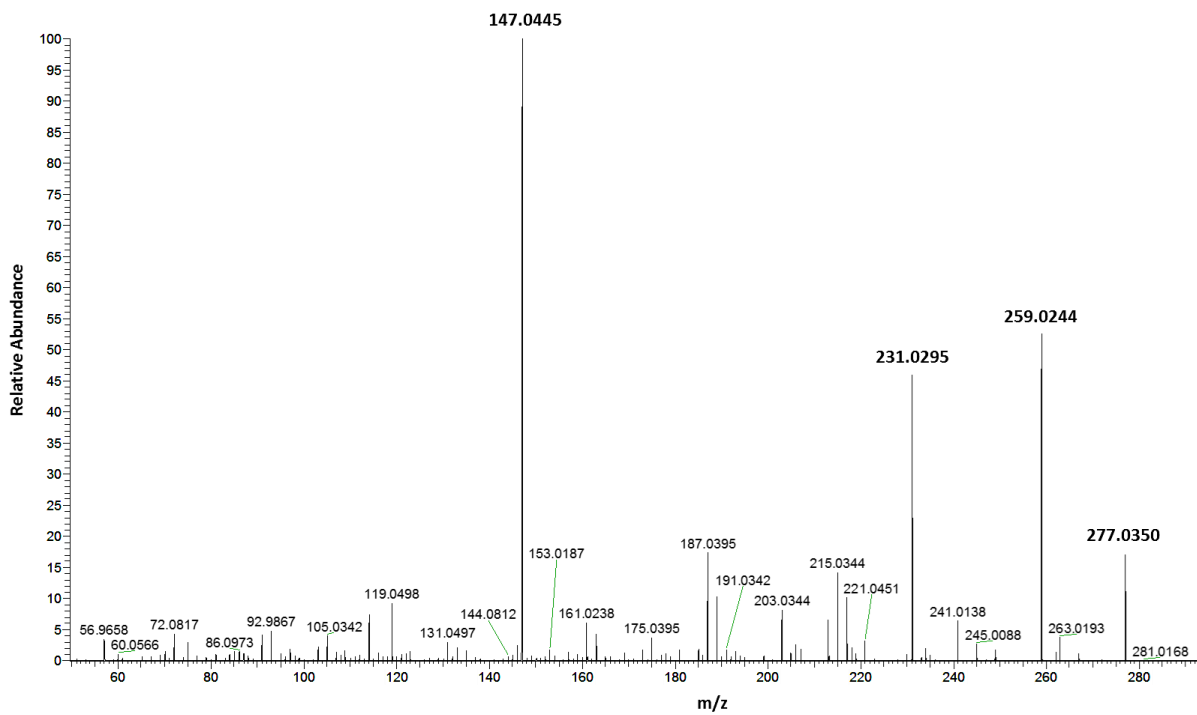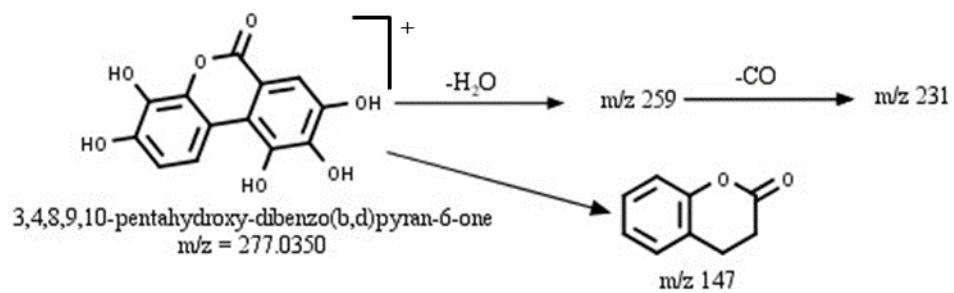

**Figure S1:** Chemical Structure of 3,4,8,9,10-pentahydroxy-dibenzo(b,d)pyran-6-one and possible mass fragmentation

55  
56  
57  
58  
59  
60  
61  
62  
63  
64  
65  
66  
67  
68  
69  
70  
71  
72  
73  
74  
75  
76  
77  
78  
79

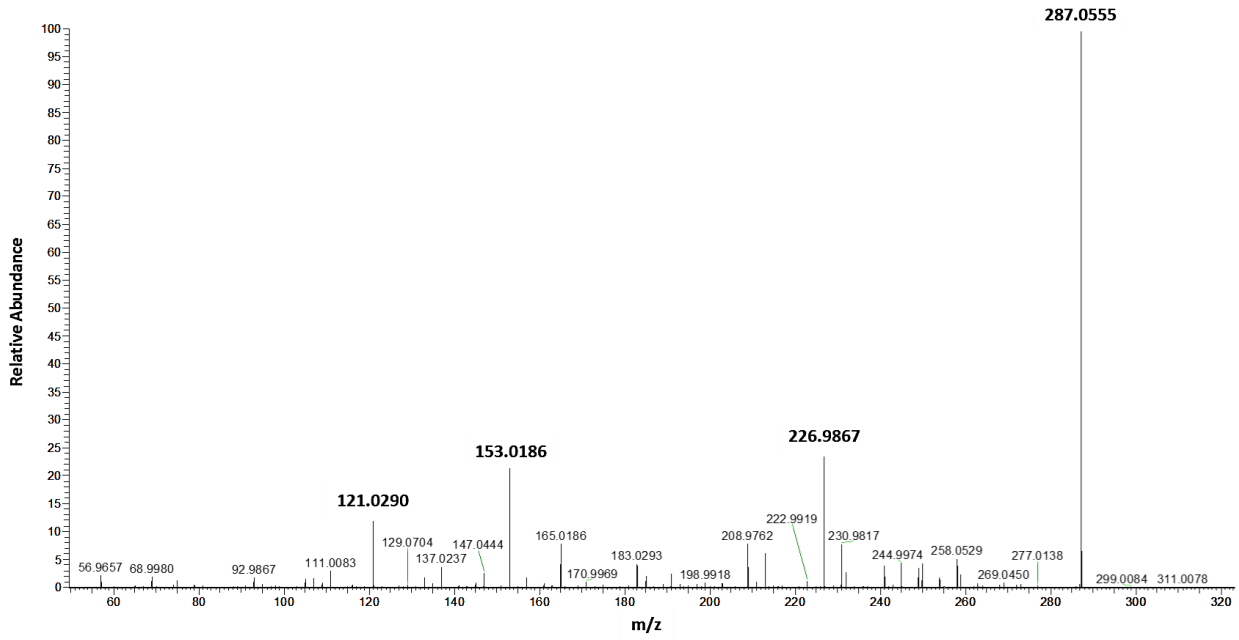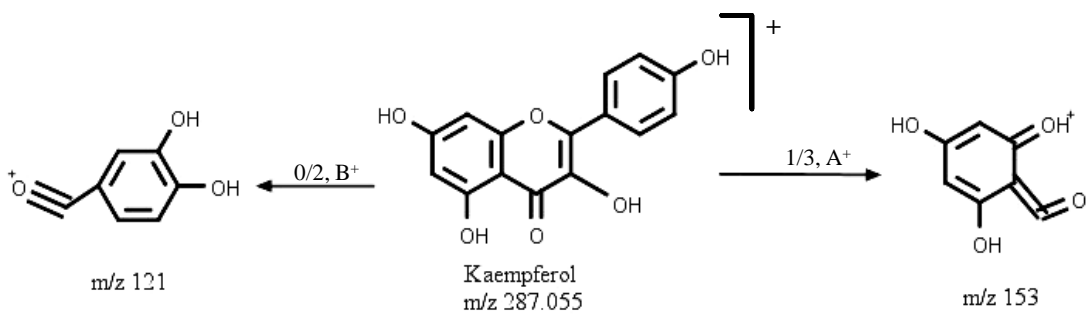

**Figure S2:** Chemical Structure of Kaempferol and the major possible mass fragmentation

80  
81  
82  
83  
84  
85  
86  
87  
88  
89  
90  
91  
92  
93  
94  
95  
96  
97  
98  
99  
100  
101  
102  
103  
104

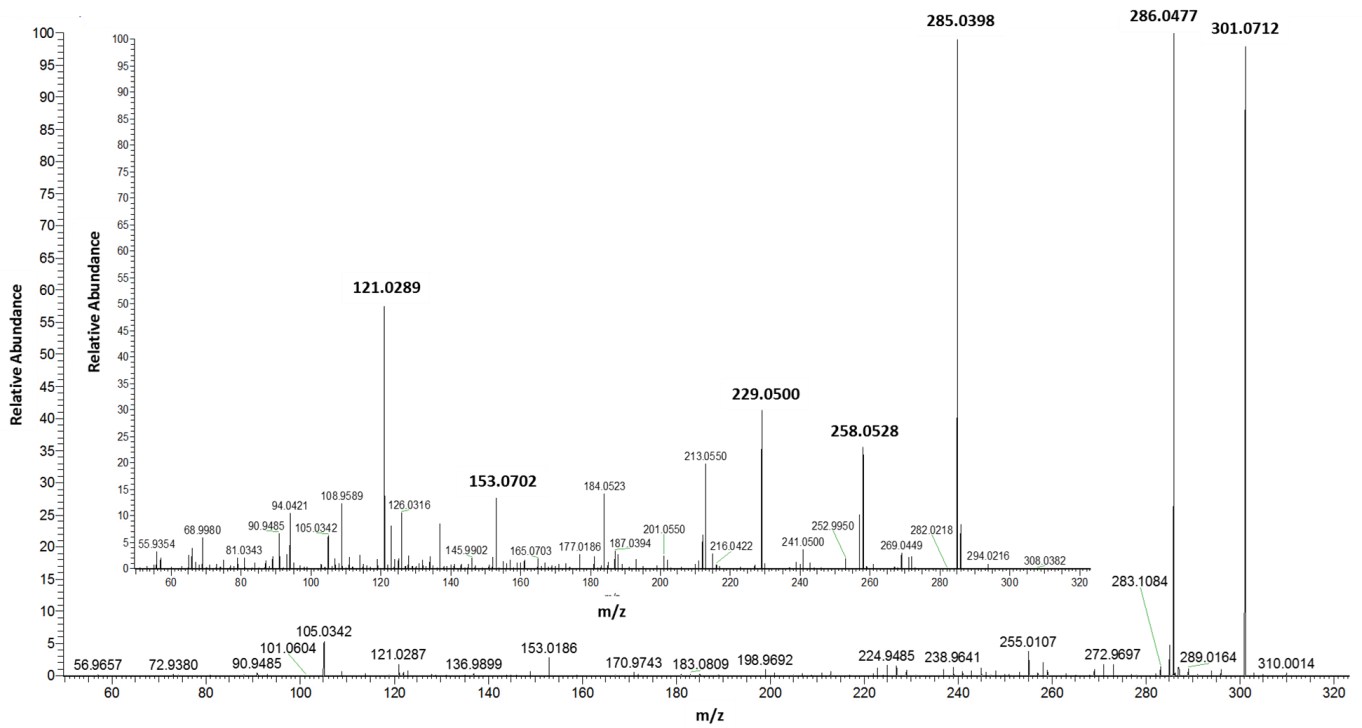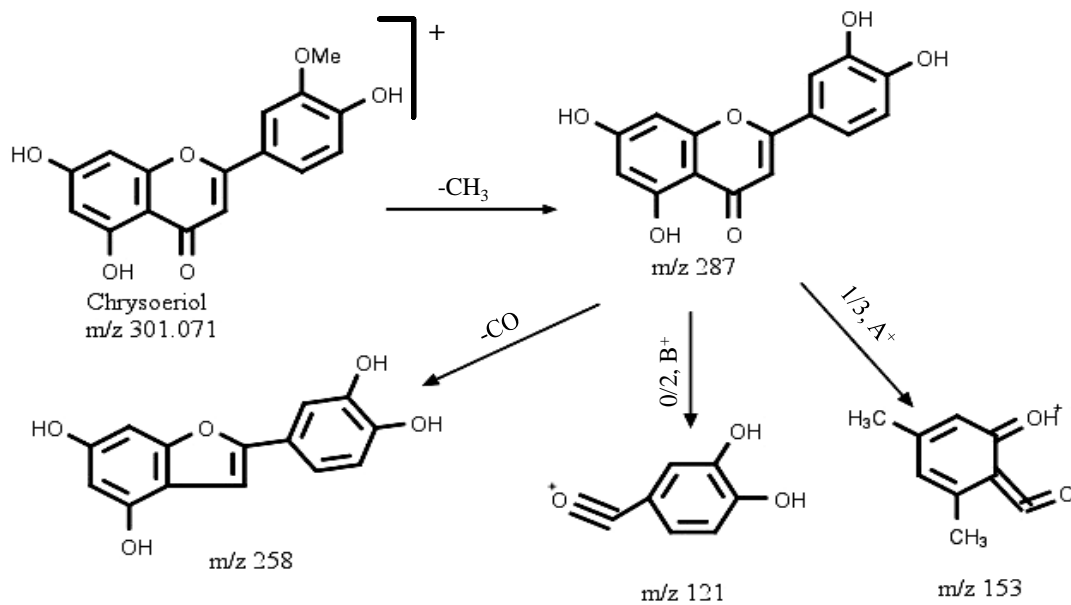

**Figure S3:** Chemical Structure of chrysoeriol and the major possible mass fragmentation

105  
 106  
 107  
 108  
 109  
 110  
 111  
 112  
 113  
 114  
 115  
 116  
 117  
 118  
 119  
 120  
 121  
 122  
 123  
 124  
 125  
 126  
 127  
 128  
 129

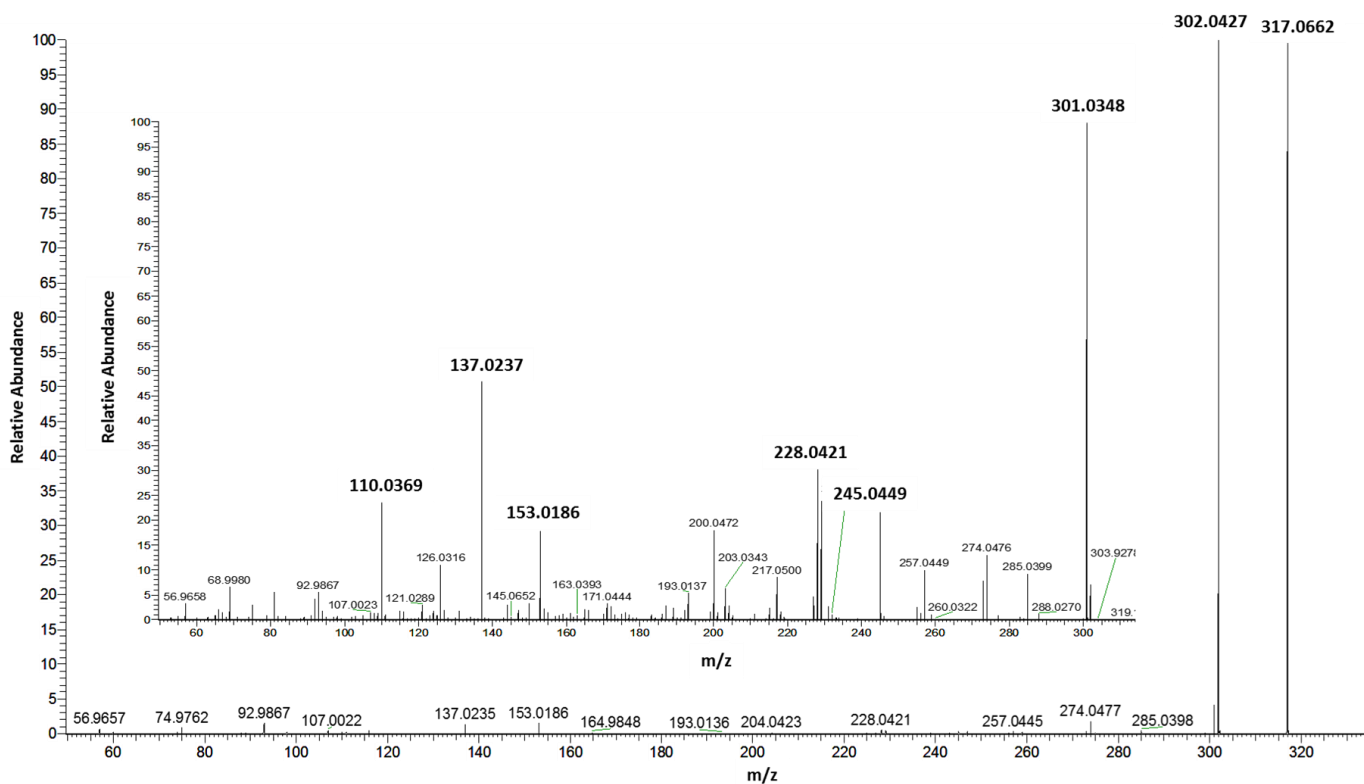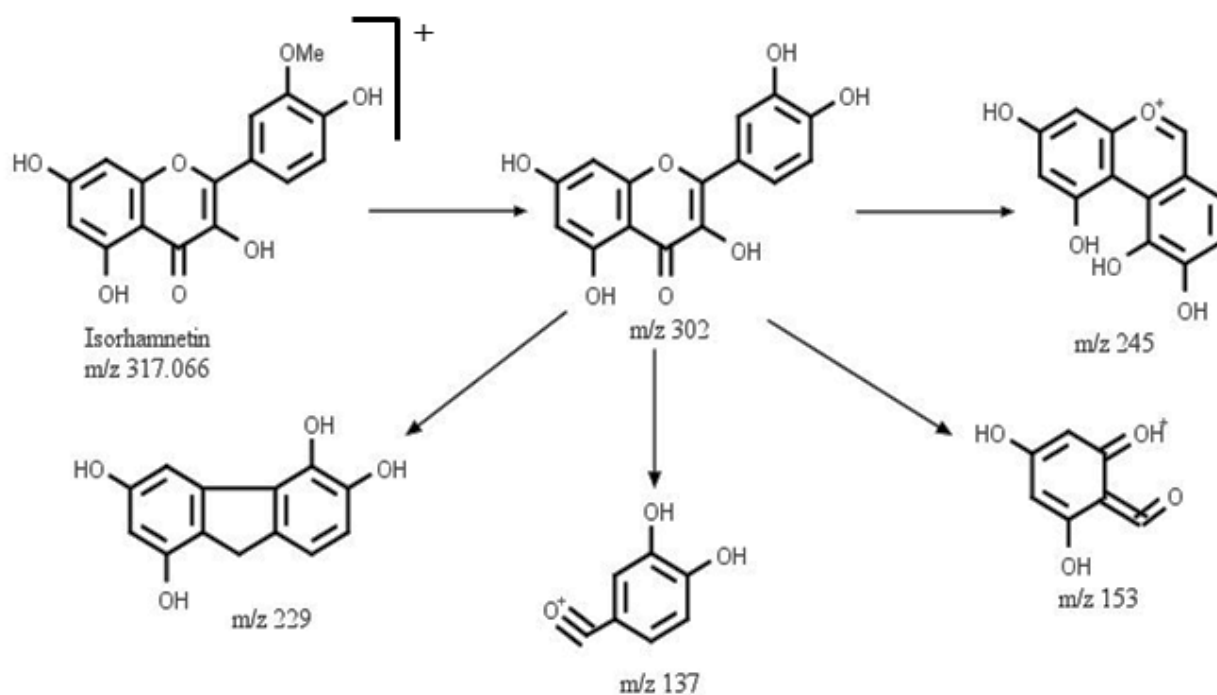

**Figure S4:** Chemical Structure of isorhamnetin and the major possible mass fragmentation

130  
131  
132  
133  
134

135  
136  
137  
138  
139  
140  
141  
142  
143

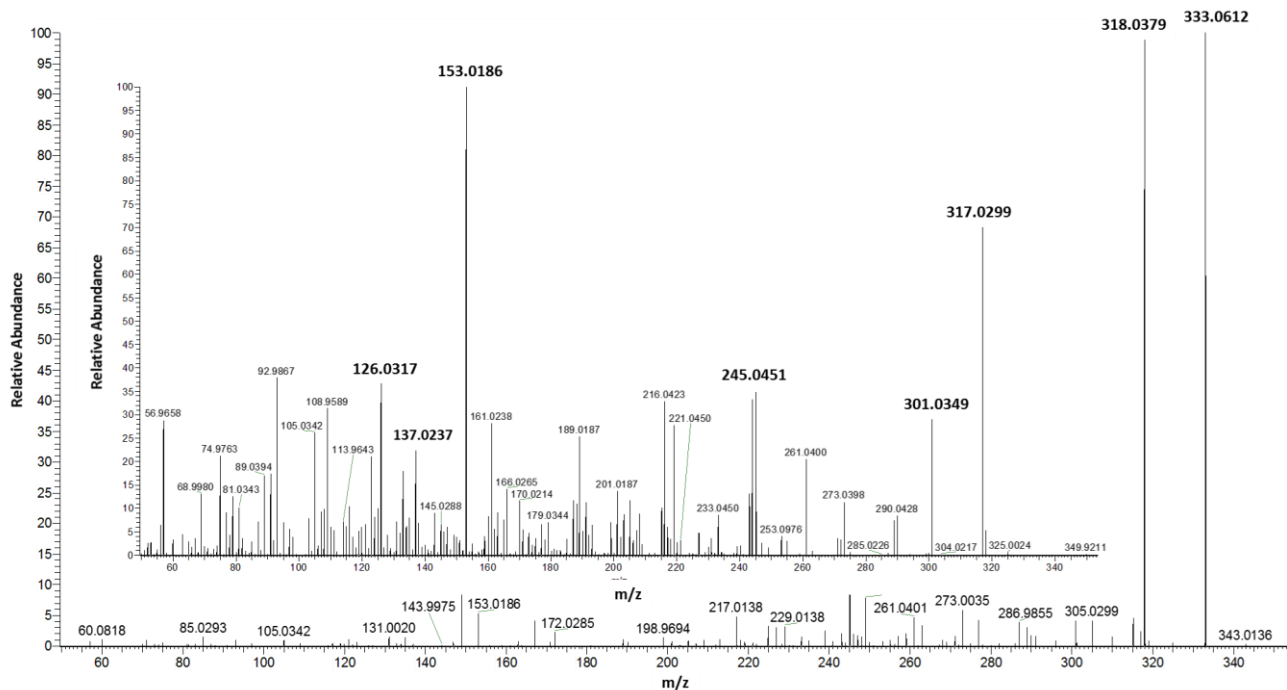

144  
145  
146  
147  
148  
149  
150  
151  
152  
153  
154

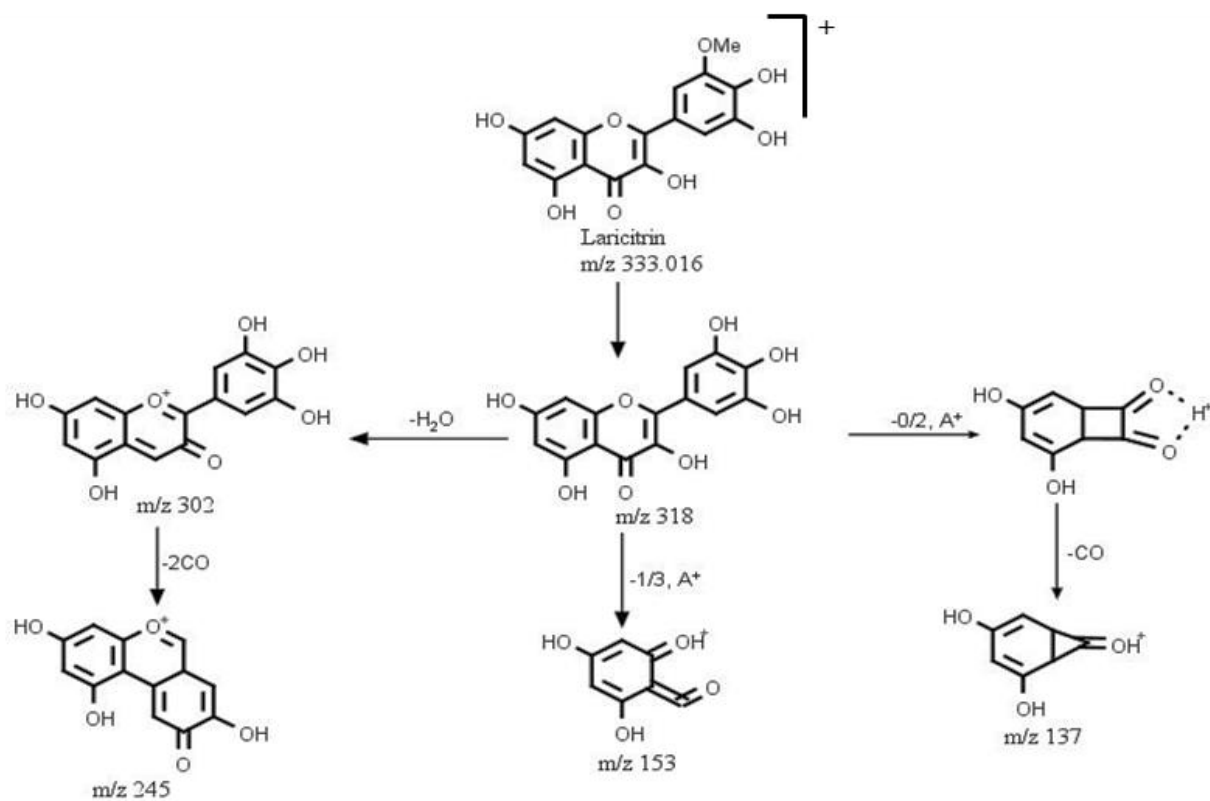

155

156 **Figure S5:** Chemical Structure of laricitrin and the major possible mass fragmentation

157

158

159

160

161

162

163

164

165

166

167

168

169

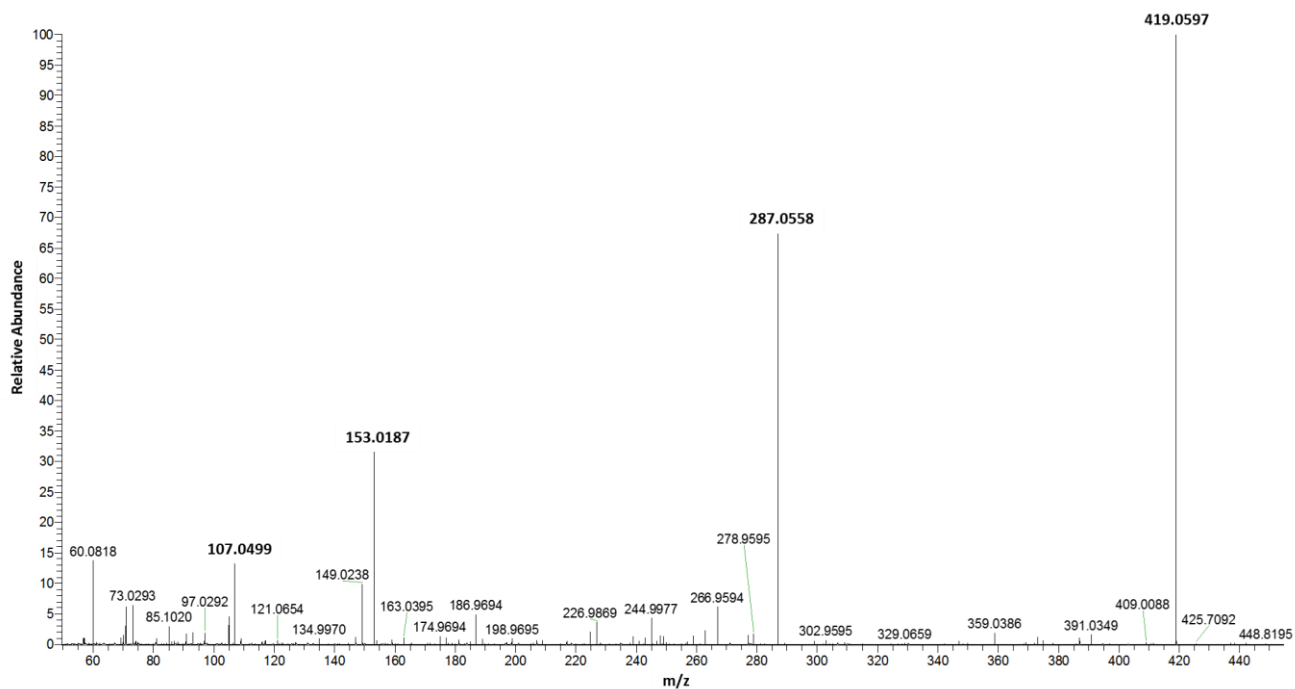

170

171

172

173

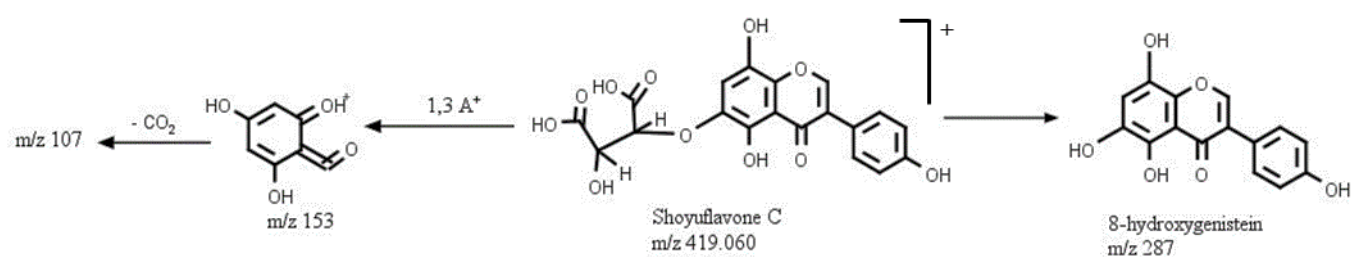

174 **Figure S6:** Chemical Structure of shoyuflavone C and the major possible mass fragmentation

175

176

177

178

179



180  
181  
182  
183  
184  
185  
186  
187  
188  
189  
190  
191  
192  
193  
194  
195  
196  
197  
198  
199  
200  
201  
202  
203  
204

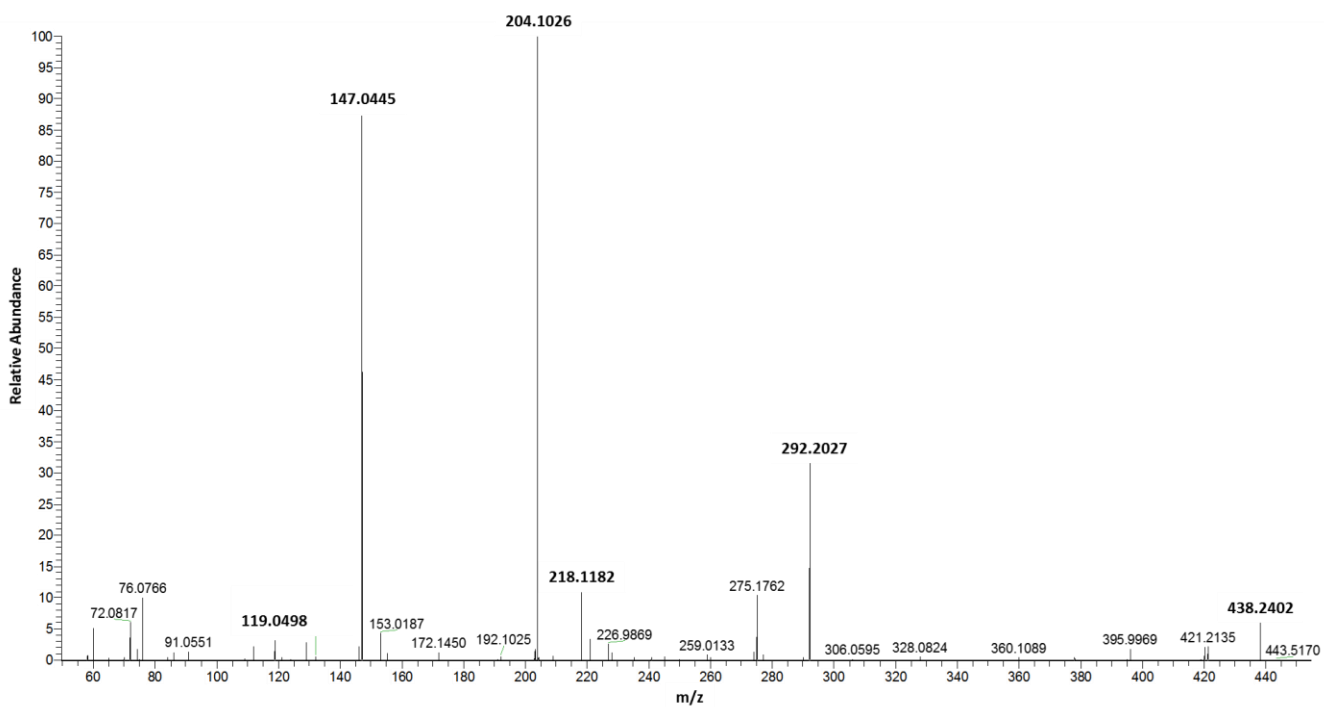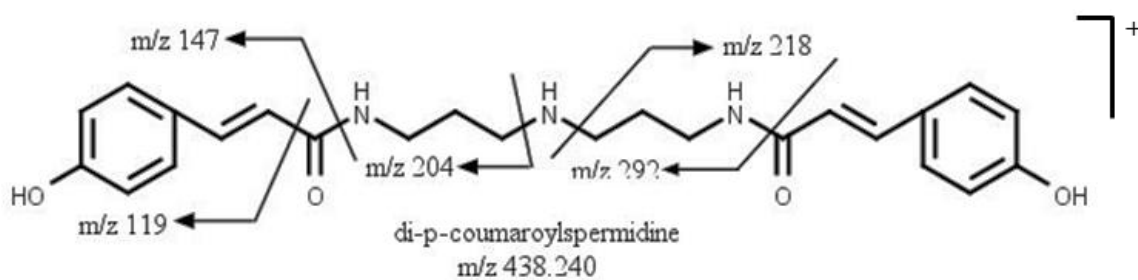

**Figure S7:** Chemical Structure of di-*p*-coumaroylspermidine and the major possible mass fragmentation

205  
 206  
 207  
 208  
 209  
 210  
 211  
 212  
 213  
 214  
 215  
 216  
 217  
 218  
 219

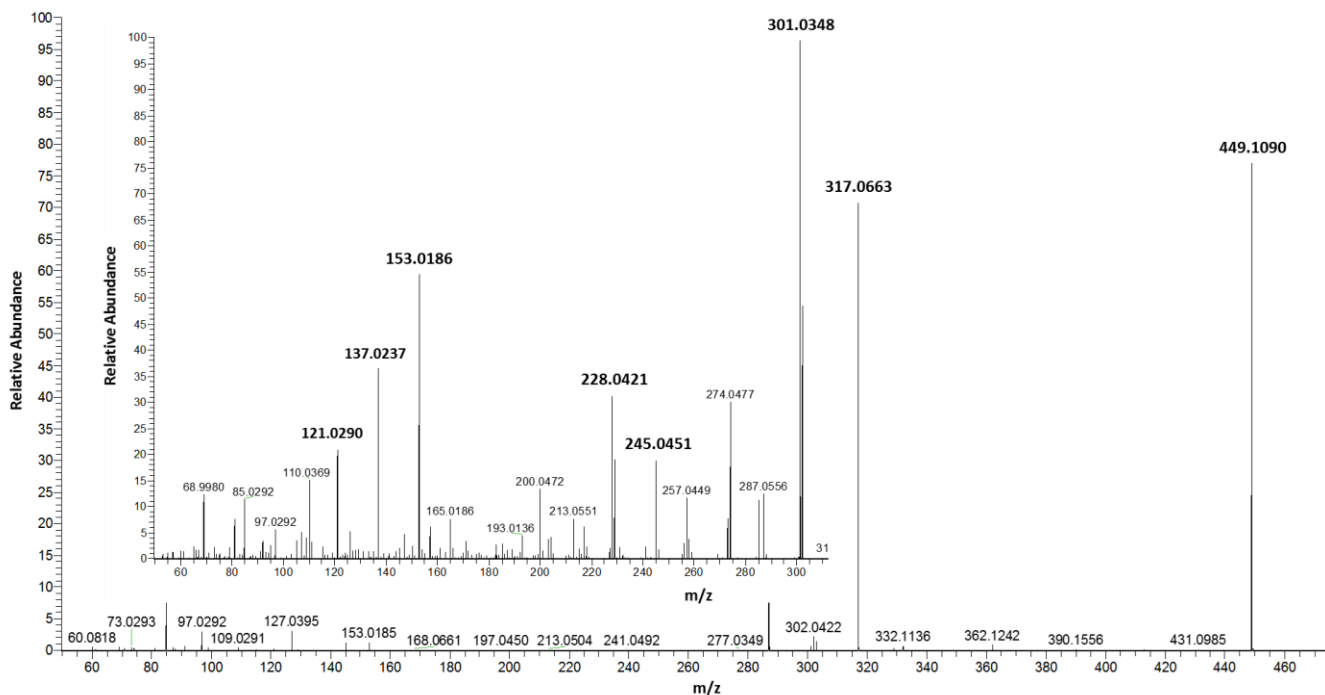

220  
 221  
 222  
 223  
 224  
 225  
 226  
 227  
 228  
 229

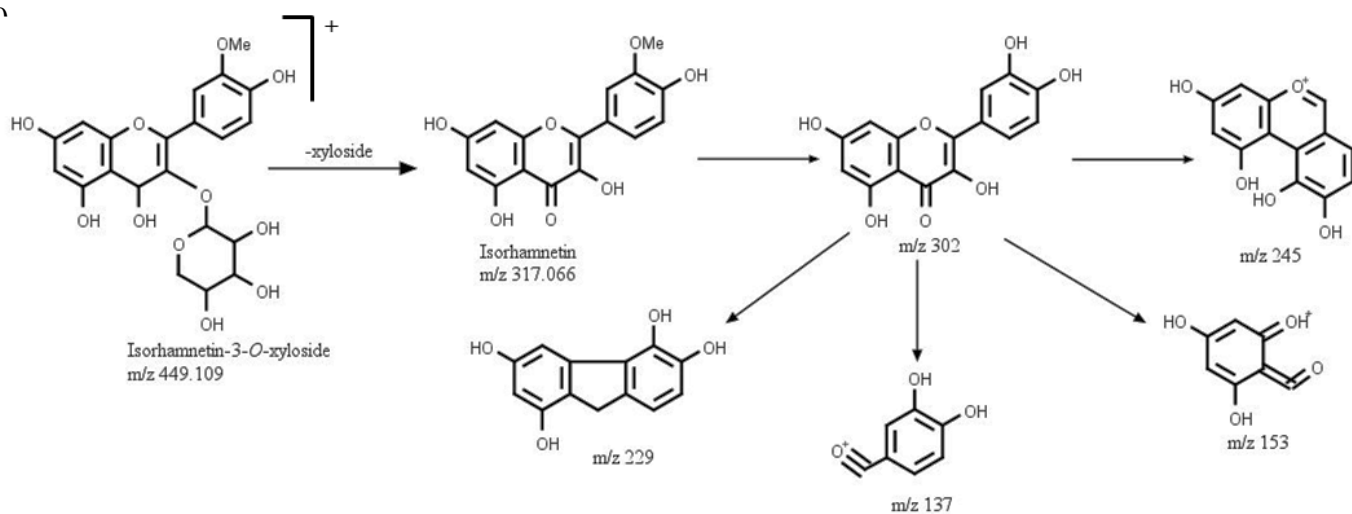

**Figure S8:** Chemical Structure of isorhamnetin-3-O-xyloside and the major possible mass fragmentation

230  
231  
232  
233  
234  
235  
236  
237  
238  
239  
240  
241  
242  
243  
244  
245  
246  
247  
248  
249  
250  
251  
252  
253  
254

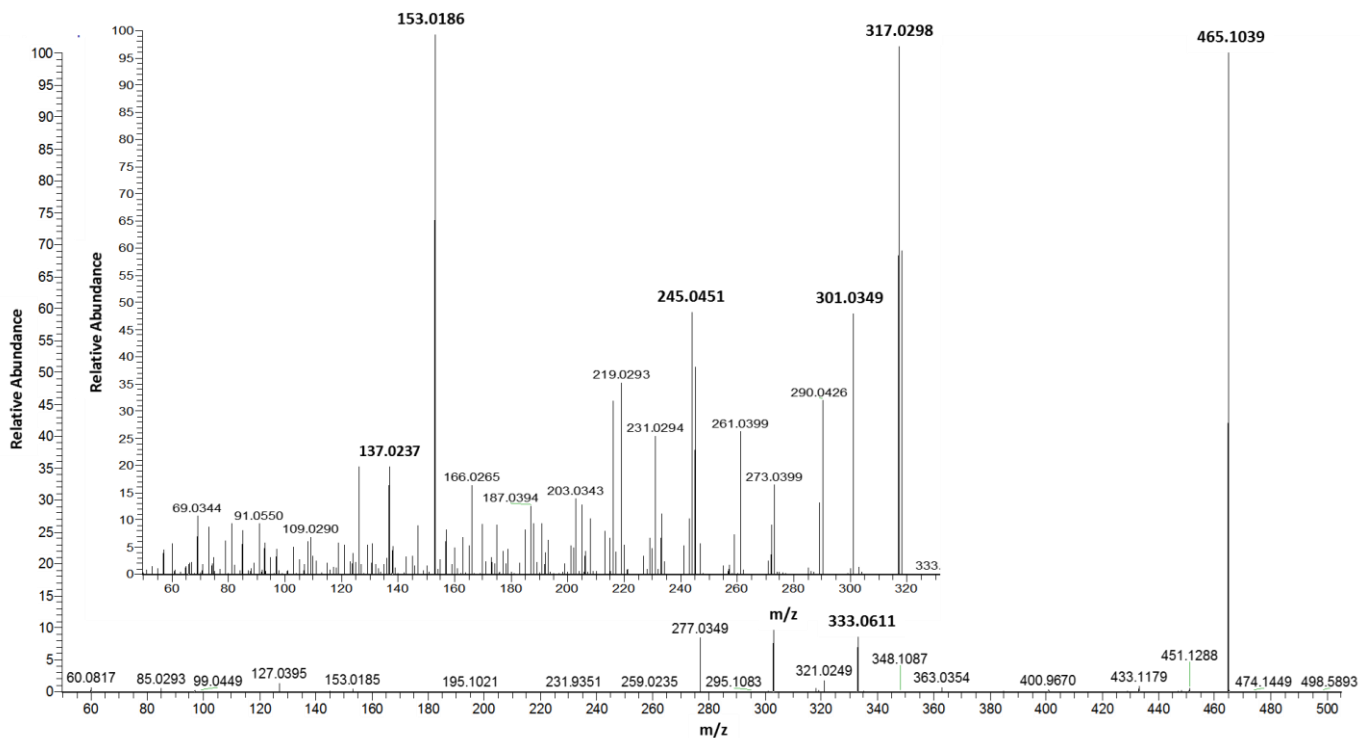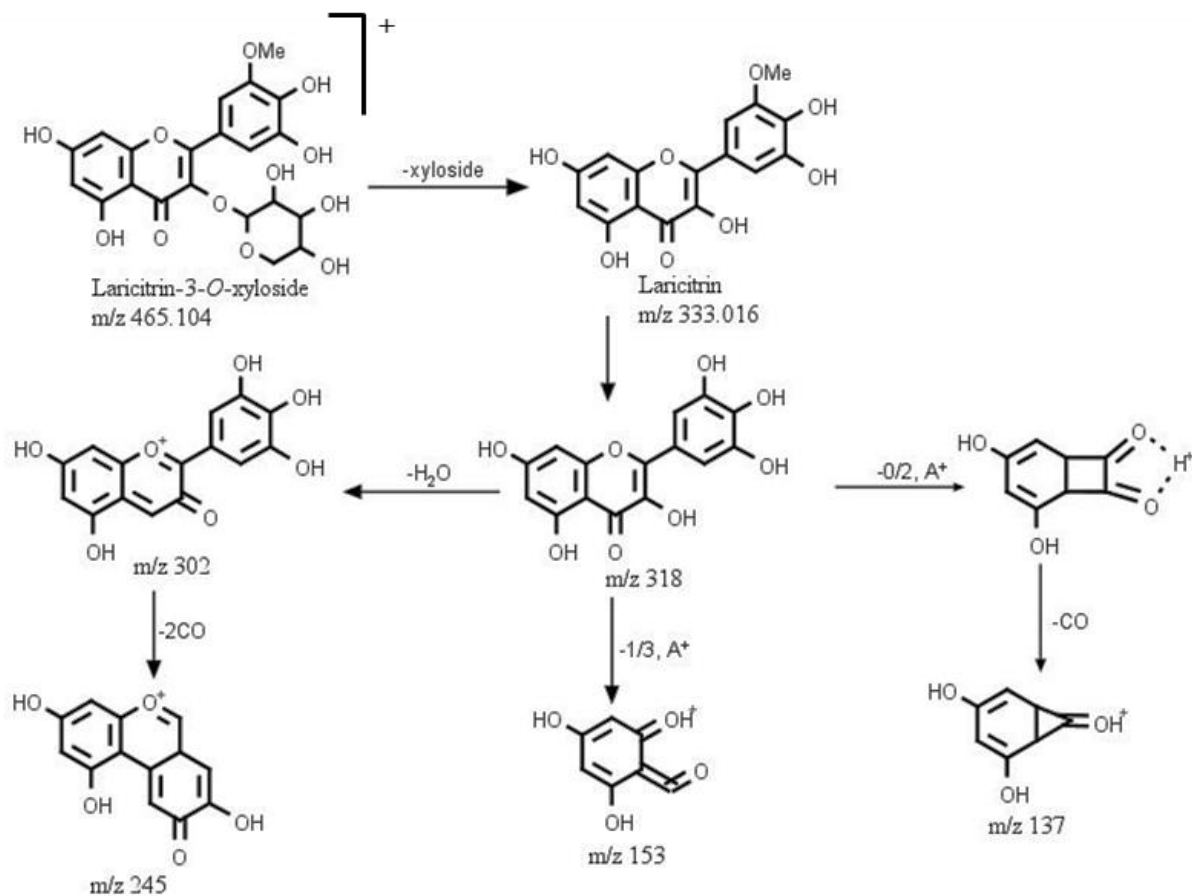

**Figure S9:** Chemical Structure of laricitrin-3-O-xyloside and the major possible mass fragmentation

255  
256  
257  
258  
259  
260  
261  
262  
263  
264  
265  
266  
267  
268  
269  
270  
271  
272  
273  
274  
275  
276  
277  
278  
279

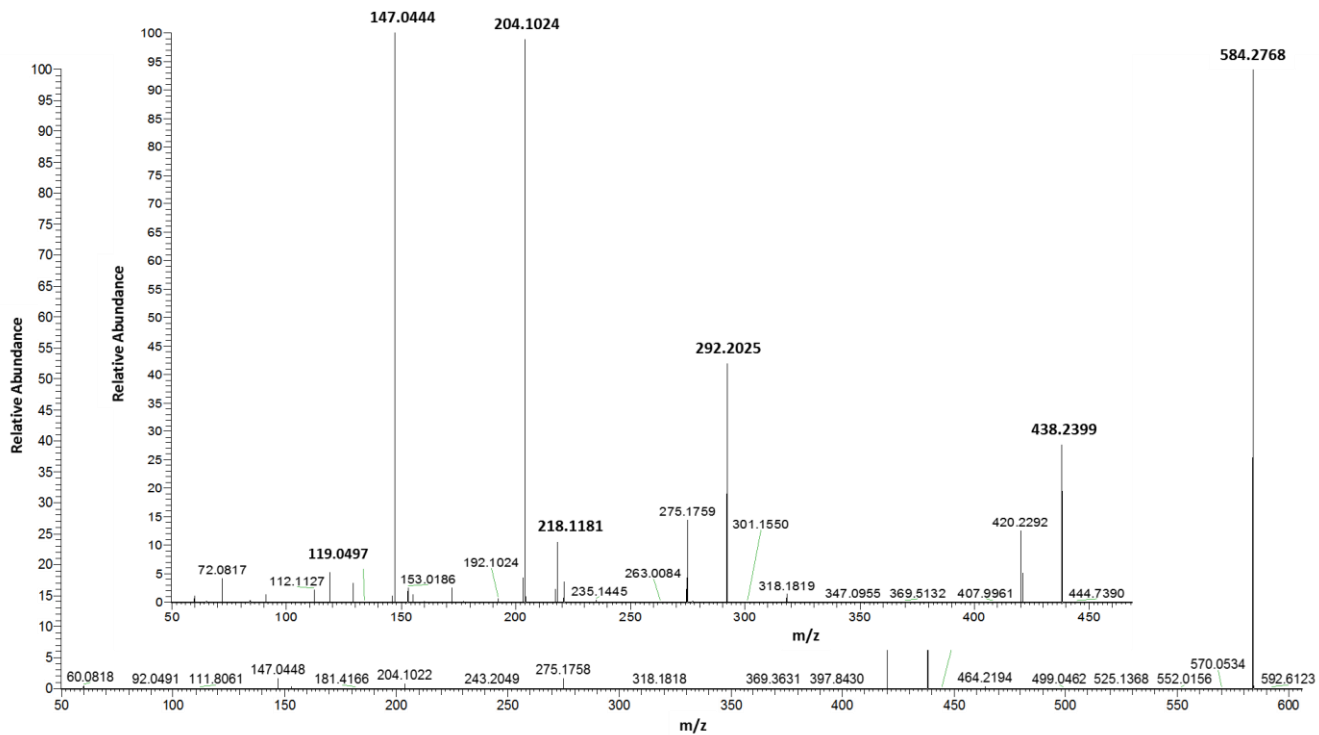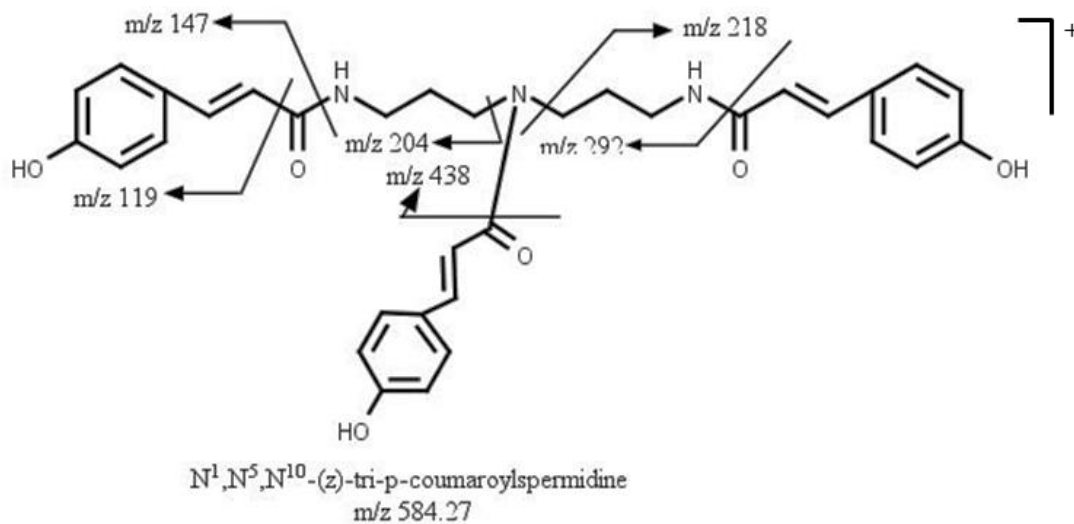

**Figure S10:** Chemical Structure of  $N^1, N^5, N^{10}$ -(z)-tri-p-coumaroylspermidine and the major possible mass fragmentation

280  
281  
282  
283  
284  
285  
286  
287  
288  
289  
290  
291  
292

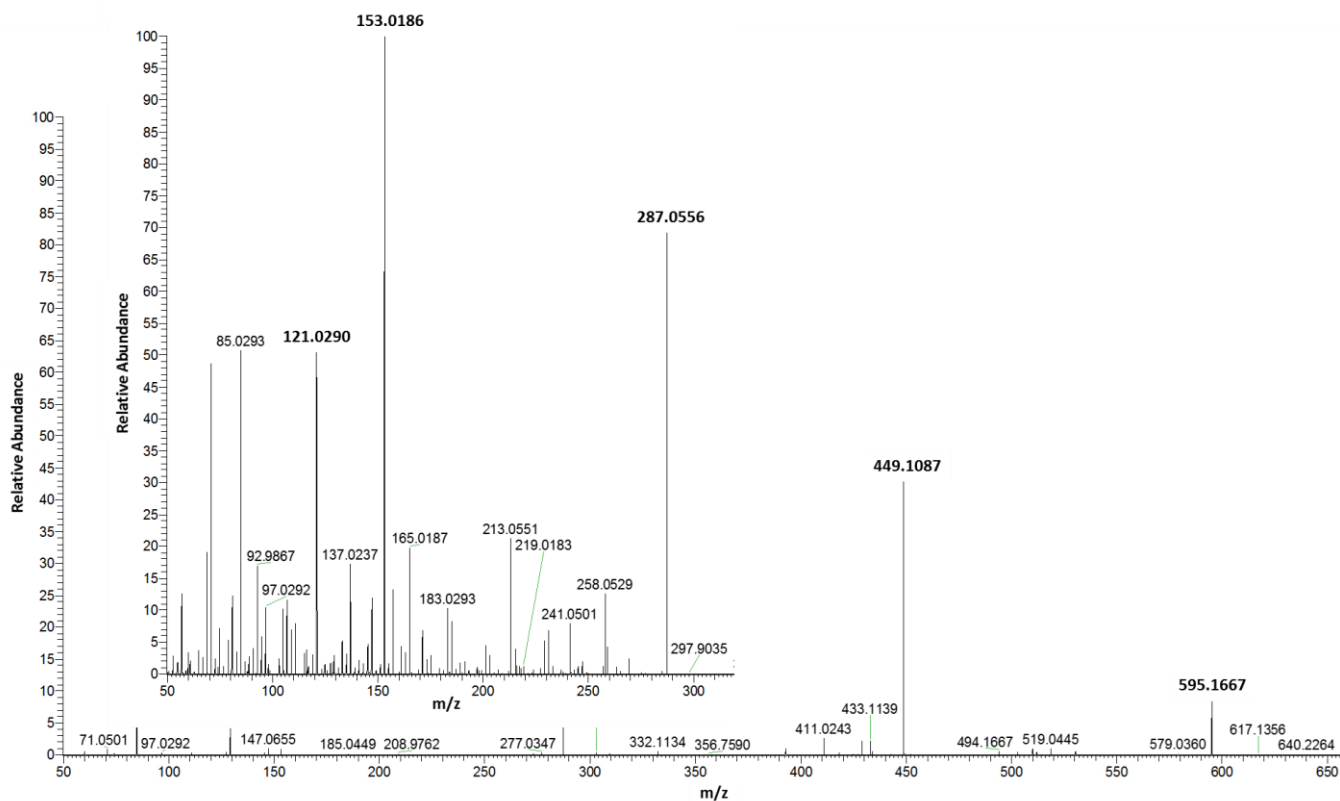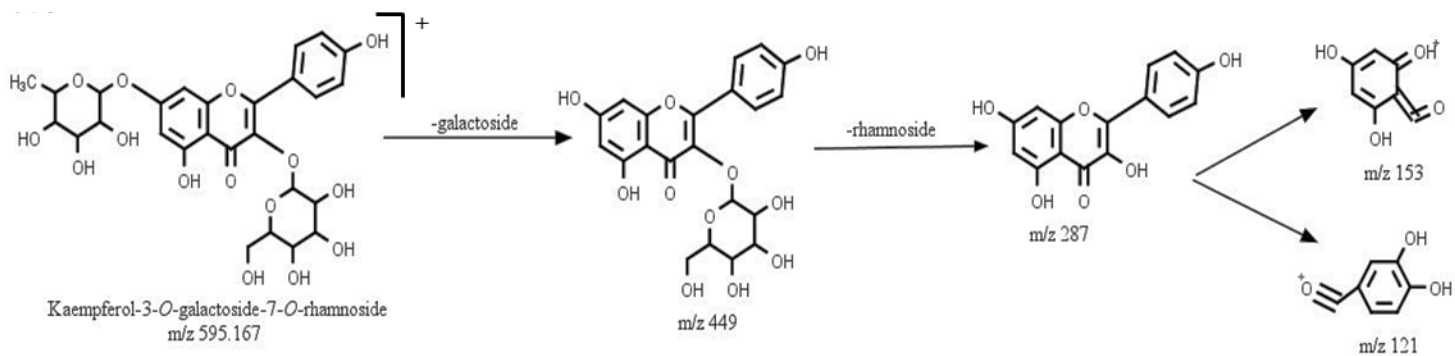

299 **Figure S11:** Chemical Structure of kaempferol-3-O-galactoside-7-O-rhamnoside and the  
300 major possible mass fragmentation

301  
302  
303  
304

305  
306  
307  
308  
309  
310  
311  
312  
313  
314  
315  
316  
317  
318  
319  
320  
321  
322  
323  
324  
325  
326  
327  
328  
329

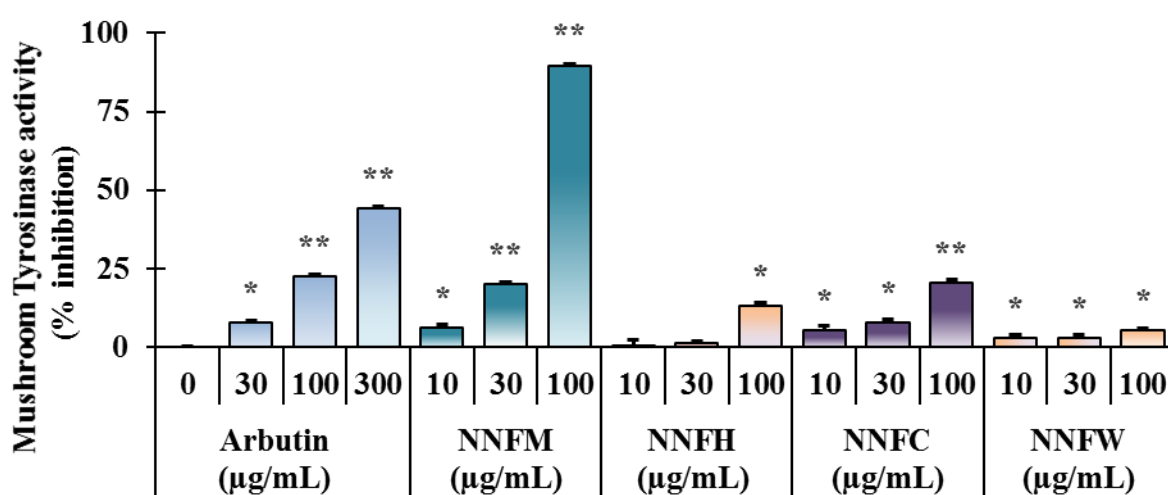

Figure S12: Mushroom tyrosinase inhibition activities of methanolic extract and various organic solution fractions of *Nymphaea nouchali* flowers. Values are expressed as the mean  $\pm$  SD (n=3). \*p < 0.05 and \*\*p < 0.01, significantly different from control, using student's t-test.

330  
331  
332  
333  
334  
335  
336  
337  
338  
339  
340  
341  
342  
343  
344  
345  
346  
347  
348  
349  
350  
351  
352  
353  
354

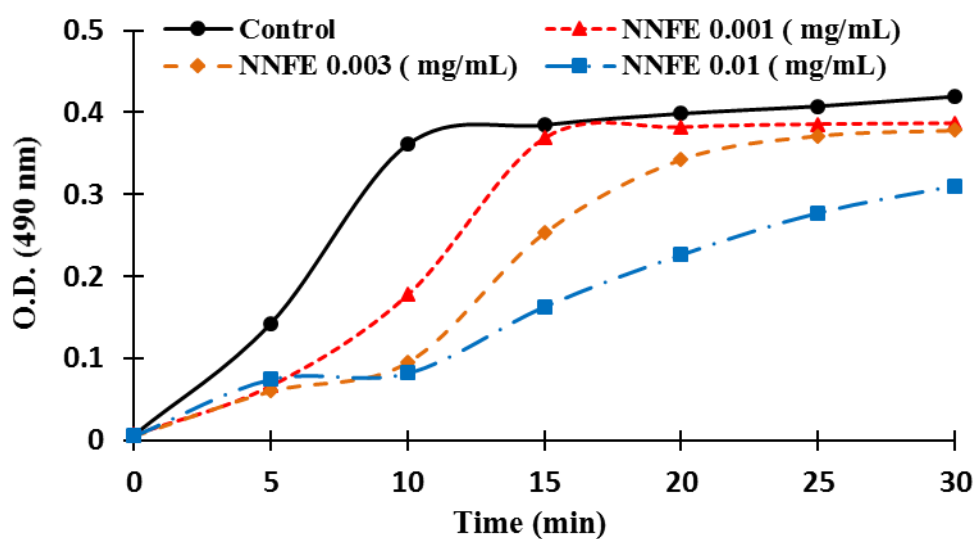

Figure S13: Mushroom tyrosinase inhibition kinetics of ethyl acetate fractions of *Nymphaea nouchali* flowers (NNFE) in which substrate is L-DOPA. Values are expressed as the mean  $\pm$  SD (n=3).

355  
356  
357  
358  
359  
360  
361  
362  
363  
364  
365  
366  
367  
368  
369  
370  
371  
372  
373  
374  
375  
376  
377  
378  
379

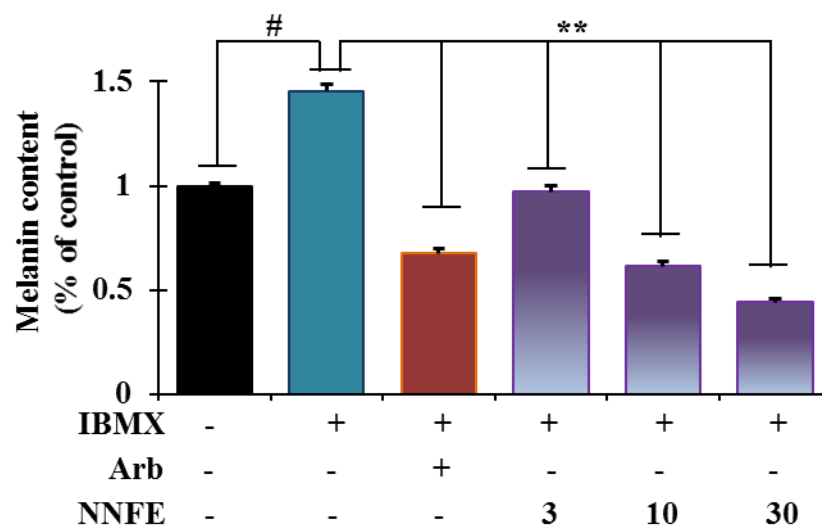

Figure S14: Cells were cultured with NNFE (3-30  $\mu\text{g ml}^{-1}$ ) for 3 days. IBMX induced melanin content were measured. Values are expressed as the mean  $\pm$  SD (n=3). #p < 0.05 significantly different from control and \*\*p < 0.01, significantly different from IBMX-induced control, using student's t-test.



380

381

382

383

384

385

386

387

388

389

390

391

392

393

394

395

396

397

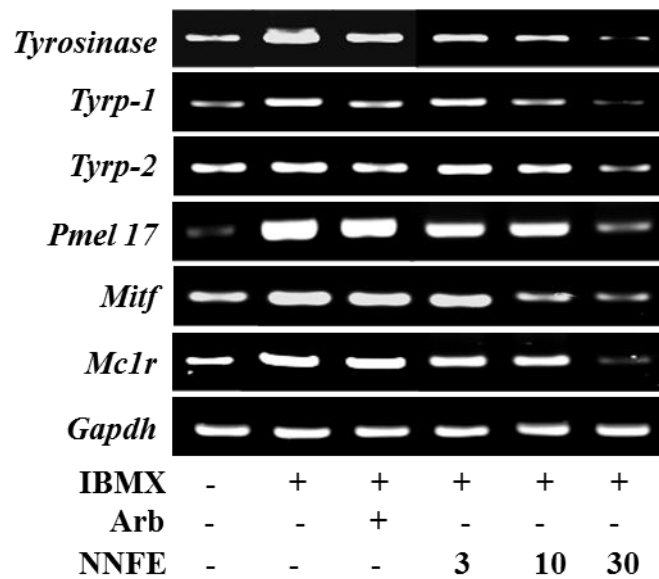

398 Figure S15: Cells ( $5 \times 10^5$  cells  $\text{ml}^{-1}$ ) were cultured for 24 h, and the medium was then

399 replaced with fresh medium containing the indicated concentrations of NNFE or arbutin for

400 24 h. mRNA was extracted using TRIzol and mRNA expressions was analyzed by RT PCR.

401

402

403

404

405  
406  
407  
408  
409  
410  
411  
412  
413  
414  
415  
416  
417  
418  
419  
420  
421  
422  
423  
424  
425  
426  
427  
428  
429

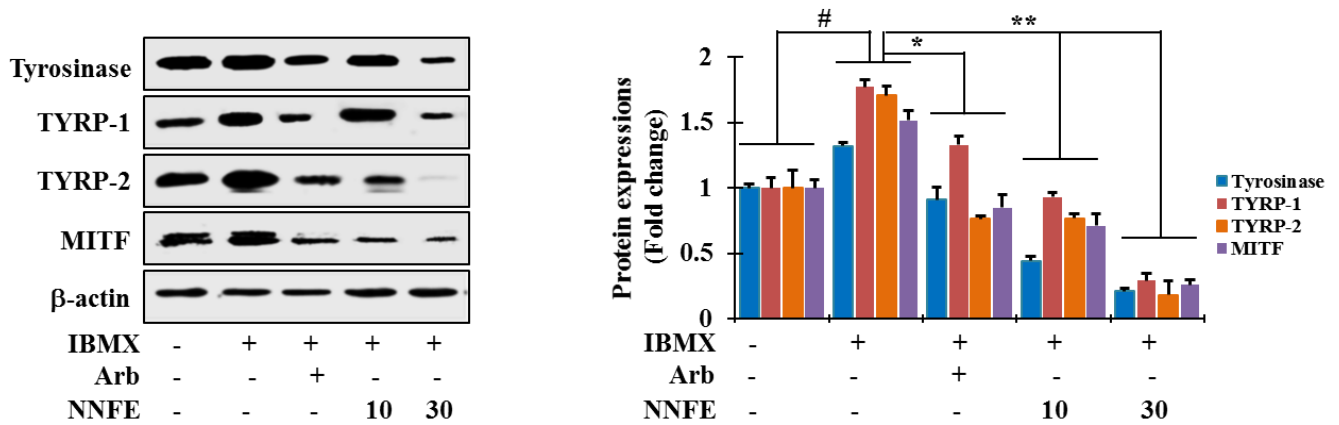

Figure S16: Cells ( $1 \times 10^5$  cells  $\text{ml}^{-1}$ ) were cultured for 24 h; medium was replaced with fresh medium containing the indicated concentrations of NNFE or arbutin for 3 days. Total cell lysates were extracted and assayed by western blotting using antibodies against tyrosinase, TYRP-1, TYRP-2, and MITF. Equal protein loadings were confirmed using  $\beta$ -actin. Arb: Arbutin. Statistical analysis of the band intensity of tyrosinase, TYRP-1, TYRP-2, and MITF obtained by western blot analysis. #p < 0.05 significantly different from control and \*\*p < 0.01, significantly different from IBMX-induced control, using student's t-test.

430

431

432

433

434

435

436

437

438

439

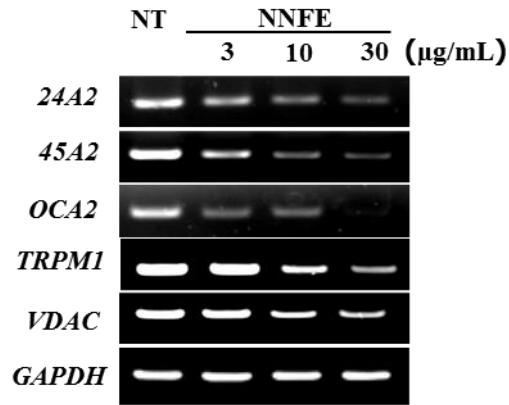

440 Figure S17: Cells ( $5 \times 10^5$  cells  $\text{ml}^{-1}$ ) were cultured for 24 h, and the medium was then

441 replaced with fresh medium containing the indicated concentrations of NNFE for 24 h.

442 mRNA was extracted using TRIzol and mRNA expressions was analyzed by RT PCR.

443
